# Supplementary material for: Inhibitory Effects of Quercetin and Its Human and Microbial Metabolites on Xanthine Oxidase Enzyme
Source: MDPI journal article supplement (doi:10.3390/ijms20112681), 2019-05-31
Supplement: s1 [file s1]

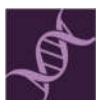

## Supplementary Materials: Inhibitory Effects of Quercetin and Its Human and Microbial Metabolites on Xanthine Oxidase Enzyme

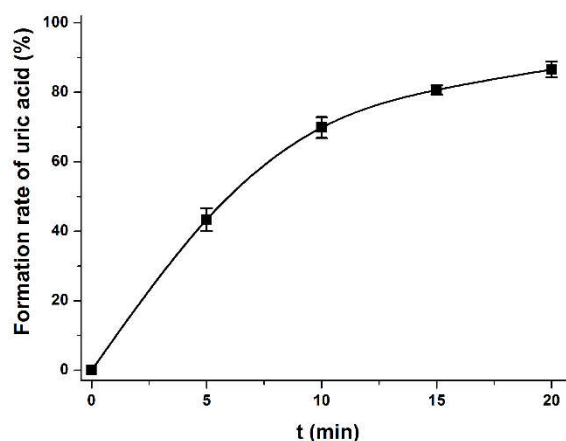

**Figure S1.** The time course of XO-catalyzed formation of uric acid from xanthine (see details in the Materials and Methods). Graph depicts % conversion of xanthine to uric acid in the absence of inhibitors.

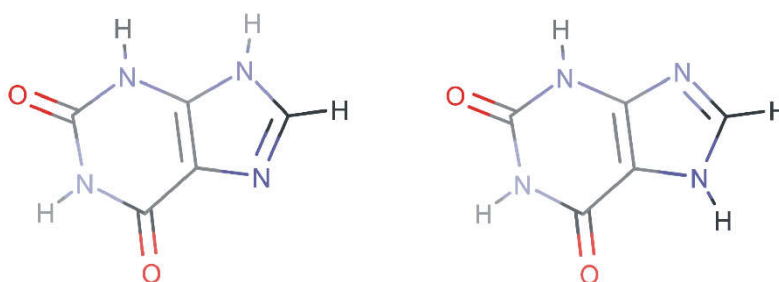

**Figure S2.** Protonation states one (left) and two (right) of xanthine.

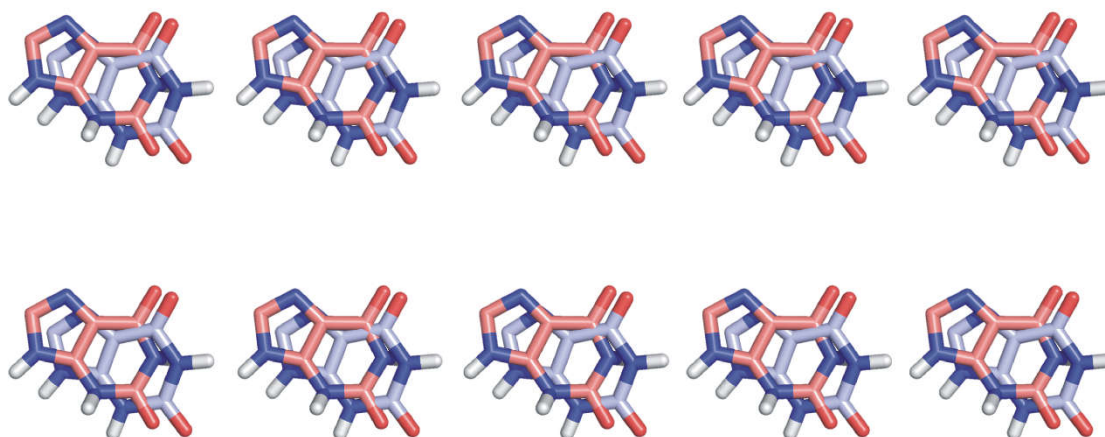

**Figure S3.** All ten docked ligand conformations (light blue) shown together with the ligand xanthine from 3eub (red, used as reference).
